# Supplementary material for: Sexual dimorphism in the walrus mandible: comparative description and geometric morphometrics
Source: PeerJ journal article supplement (doi:10.7717/peerj.13940), 2022-09-20

(1)

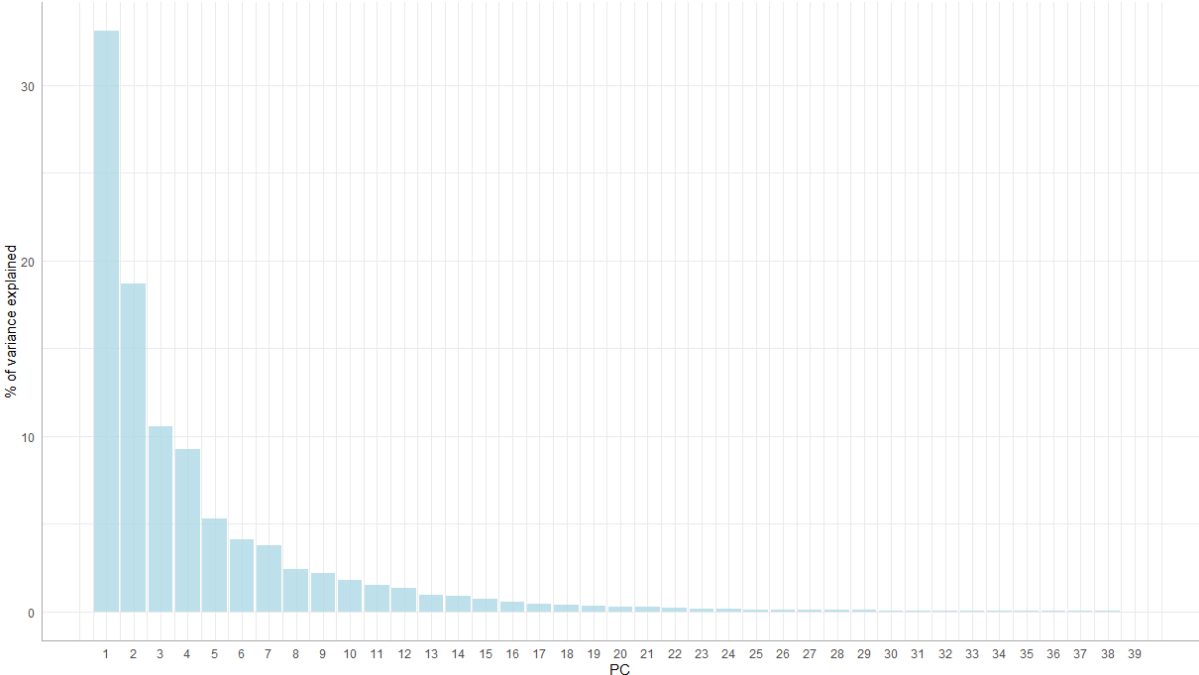

(2)

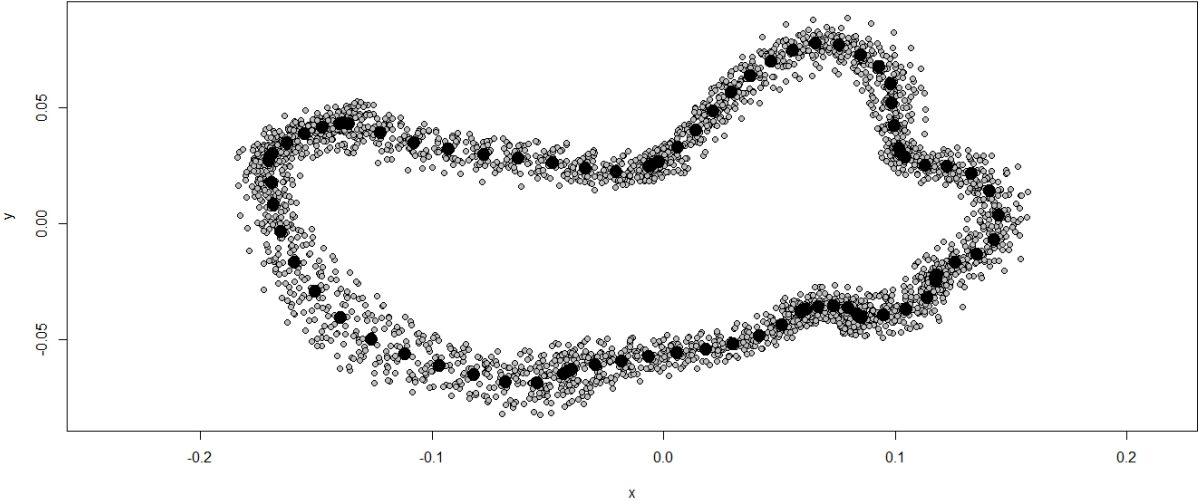

(3)

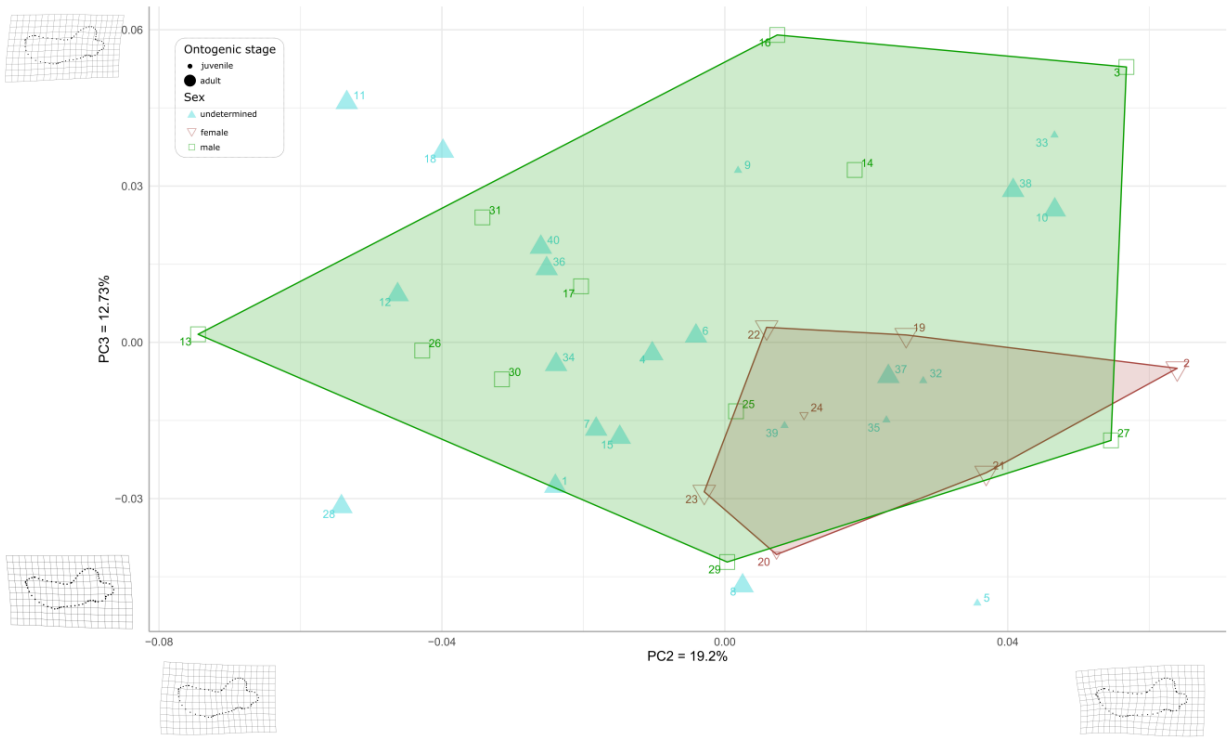

(4)

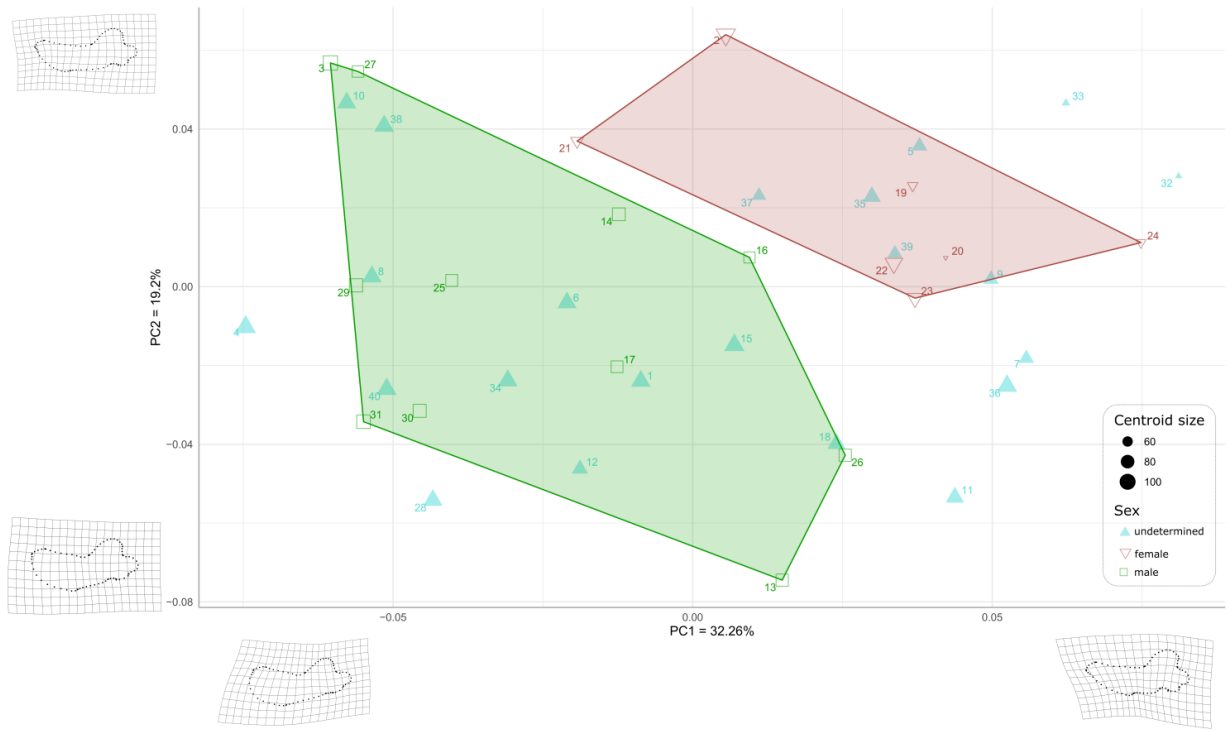

(5)

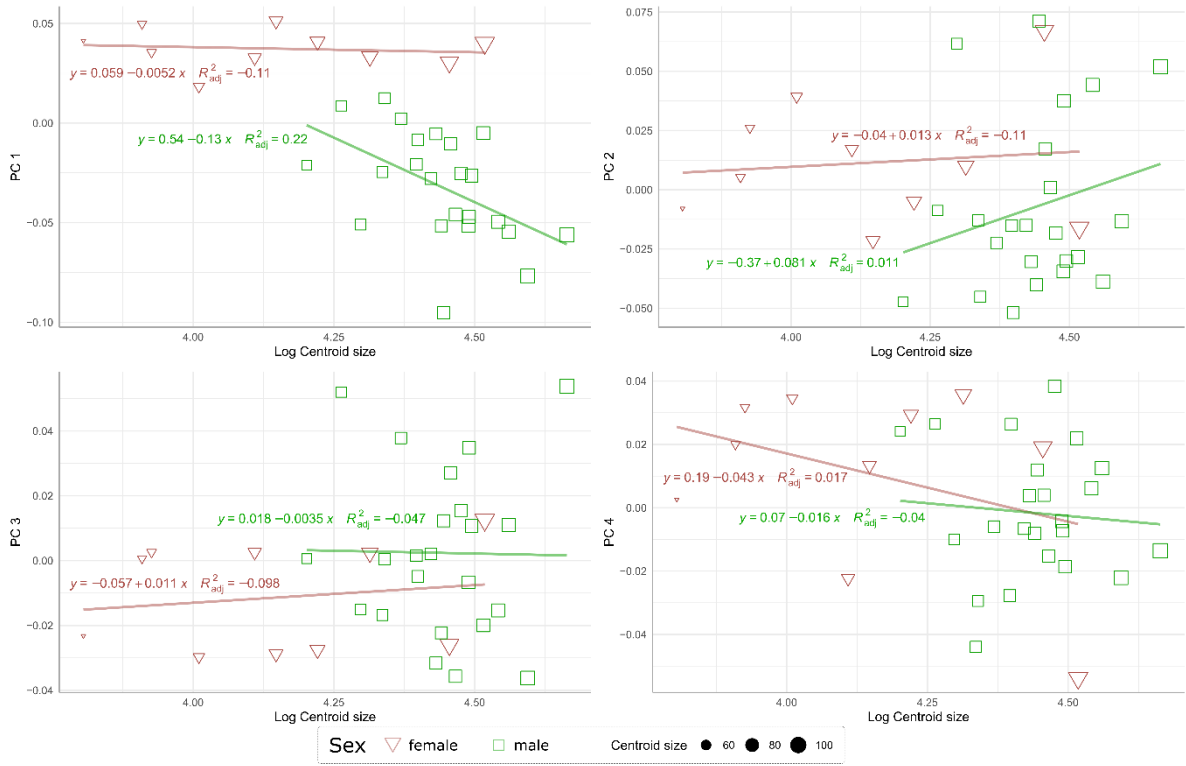

Supplement: Figure_S2.pdf [file Figure_S2.pdf]
